# Supplementary material
Source: PubMed Central journal article supplement (PMC548370)
Supplement: nar_33_2_e12__2.pdf [file nar_33_2_e12__2.pdf]

Table S1. Summary of the analysis of 23 pairs of sequences.

| Class | # of genes | Gene A       | Gene B | Significant region( $ Z  > 1.96$ ); 1 = detected, 0 = not detected |   |    |   |
|-------|------------|--------------|--------|--------------------------------------------------------------------|---|----|---|
|       |            |              |        | M                                                                  | I | K  | C |
| A     | 3          | FBP29        | FBP26  | 0                                                                  | 0 | 0  | 1 |
|       |            | FBP29        | PFG    | 0                                                                  | 0 | 1  | 1 |
|       |            | FBP26        | PFG    | 0                                                                  | 0 | 0  | 0 |
| B-AP3 | 2          | Not analyzed |        |                                                                    |   |    |   |
| B-PI  | 2          | FBP1         | PMADS2 | 0                                                                  | 1 | 0  | 0 |
| C     | 2          | PMADS3       | FBP6   | 0                                                                  | 0 | 0  | 0 |
| D     | 2          | FBP11        | FBP7   | 0                                                                  | 0 | 0  | 0 |
| E     | 5          | FBP9         | FBP23  | 0                                                                  | 0 | 0  | 0 |
|       |            | FBP9         | FBP4   | 0                                                                  | 0 | 0  | 0 |
|       |            | FBP9         | FBP2   | 0                                                                  | 0 | 0  | 0 |
|       |            | FBP9         | FBP5   | 0                                                                  | 0 | 1  | 0 |
|       |            | FBP23        | FBP4   | 0                                                                  | 0 | 1  | 0 |
|       |            | FBP23        | FBP2   | 0                                                                  | 0 | 1  | 0 |
|       |            | FBP23        | FBP5   | 0                                                                  | 0 | 1  | 0 |
|       |            | FBP4         | FBP2   | 0                                                                  | 0 | 0  | 0 |
|       |            | FBP4         | FBP5   | 0                                                                  | 0 | 1  | 0 |
| FBP2  | FBP5       | 0            | 0      | 1                                                                  | 0 |    |   |
| F     | 4          | FBP20-UNS    | FBP21  | 0                                                                  | 0 | 0  | 0 |
|       |            | FBP20-UNS    | FBP28  | 0                                                                  | 0 | 0  | 0 |
|       |            | FBP21        | FBP28  | 0                                                                  | 0 | 1  | 0 |
|       |            | FBP20-UNS    | FBP22  | 1                                                                  | 0 | 0  | 0 |
|       |            | FBP21        | FBP22  | 0                                                                  | 0 | 1  | 0 |
|       |            | FBP28        | FBP22  | 0                                                                  | 0 | 1  | 0 |
| G     | 1          | Not analyzed |        |                                                                    |   |    |   |
| T     | 2          | FBP13        | FBP25  | 0                                                                  | 1 | 1  | 1 |
| Total | 23 genes   | 23 pairs     |        | 1                                                                  | 2 | 11 | 3 |
|       |            |              |        | 14 pairs*                                                          |   |    |   |

\*Some pairs showed significant rate differences in more than one domain.
